# Supplementary material for: Ultrafine AuPd nanoparticles supported on amine functionalized monochlorotriazinyl β-cyclodextrin as highly active catalysts for hydrogen evolution from formic acid dehydrogenation
Source: Royal Society of Chemistry journal article supplement (doi:10.1039/c9cy02464f), 2020-01-01
Supplement: c9cy02464f1.pdf [file c9cy02464f1.pdf]

# Supplementary Information

## Ultrafine AuPd Nanoparticles Supported on Amine Functionalized Monochlorotriazinyl $\beta$ -Cyclodextrin as Highly Active Catalysts for Hydrogen Evolution from Formic Acid Dehydrogenation

*Xue Liu<sup>a</sup>, Dawei Gao<sup>a</sup>, Yue Chi<sup>a</sup>, Hongli Wang<sup>a,\*</sup>, Zhili Wang<sup>b,\*</sup> and Zhankui*

*Zhao<sup>a</sup>*

<sup>a</sup> Key Laboratory of Advanced Structural Materials of Ministry of Education, College of Material Science and Engineering, Changchun University of Technology, Changchun 130012, China

<sup>b</sup> Key Laboratory of Automobile Materials Ministry of Education, Department of Materials Science and Engineering, Jilin University, Changchun 130022, China

*\*Corresponding Authors' e-mail addresses: wanghongli@ccut.edu.cn (H. Wang); zhiliwang@jlu.edu.cn (Z. Wang);*

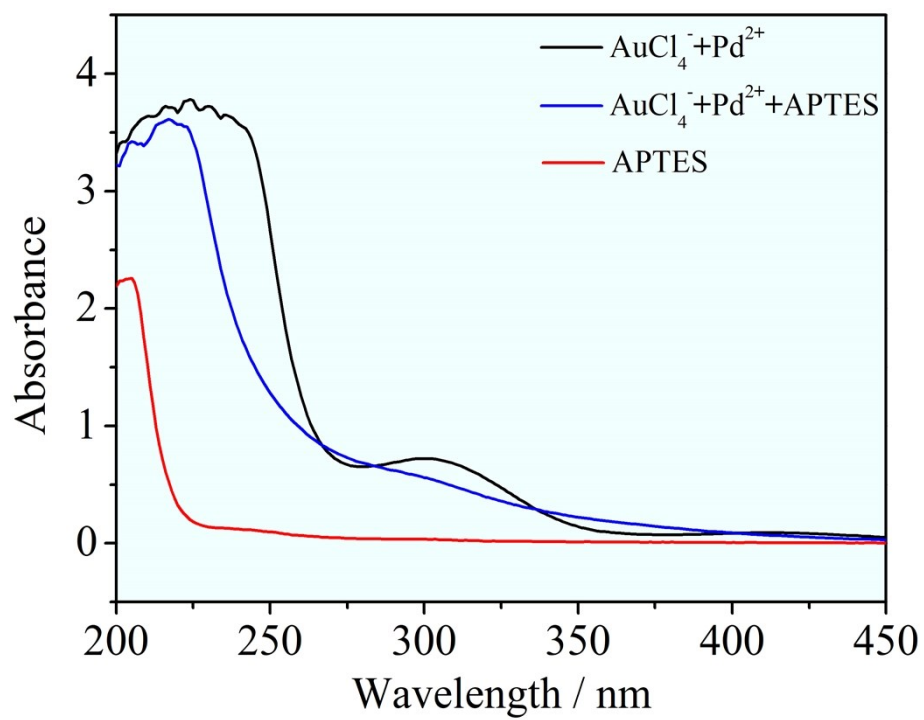

**Fig. S1** UV-vis spectra of aqueous solutions containing various species.

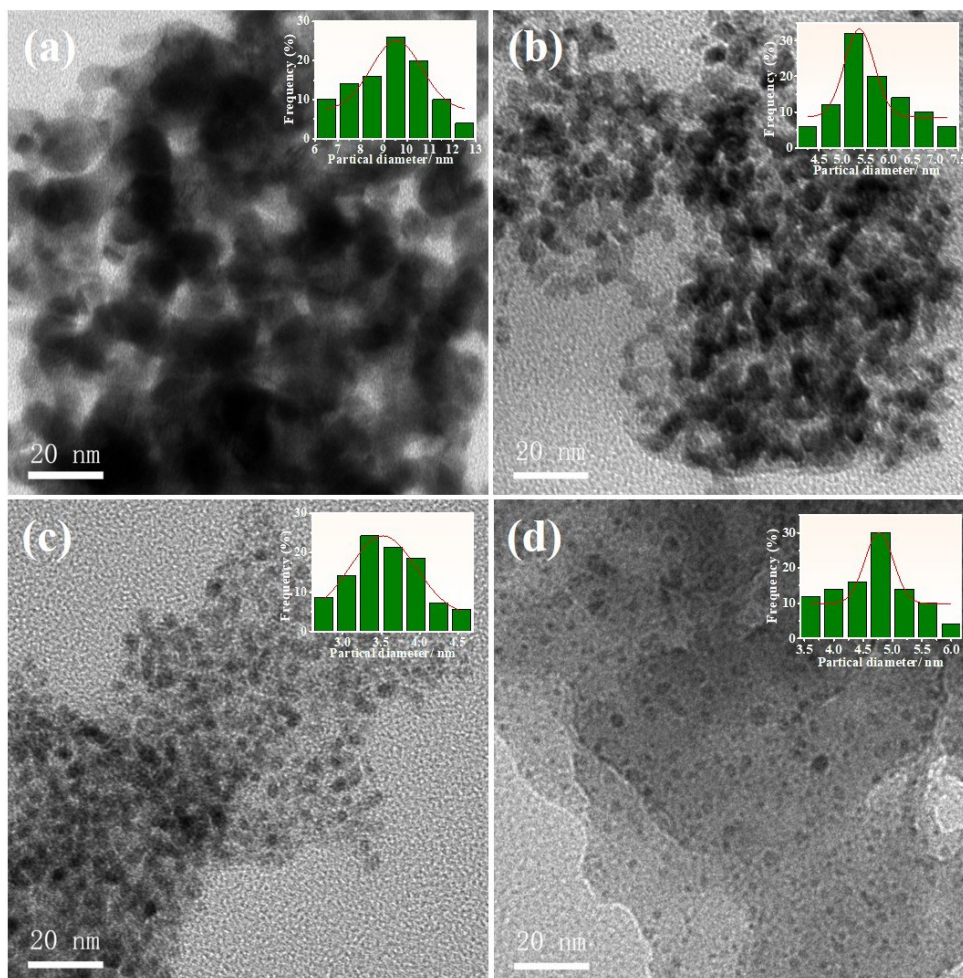

**Fig. S2** TEM images and corresponding particle size distribution of (a) Au<sub>0.3</sub>Pd<sub>0.7</sub>, (b) Au<sub>0.3</sub>Pd<sub>0.7</sub>/M-β-CD, (c) Au<sub>0.3</sub>Pd<sub>0.7</sub>-A, (d) Au<sub>0.3</sub>Pd<sub>0.7</sub>/C.

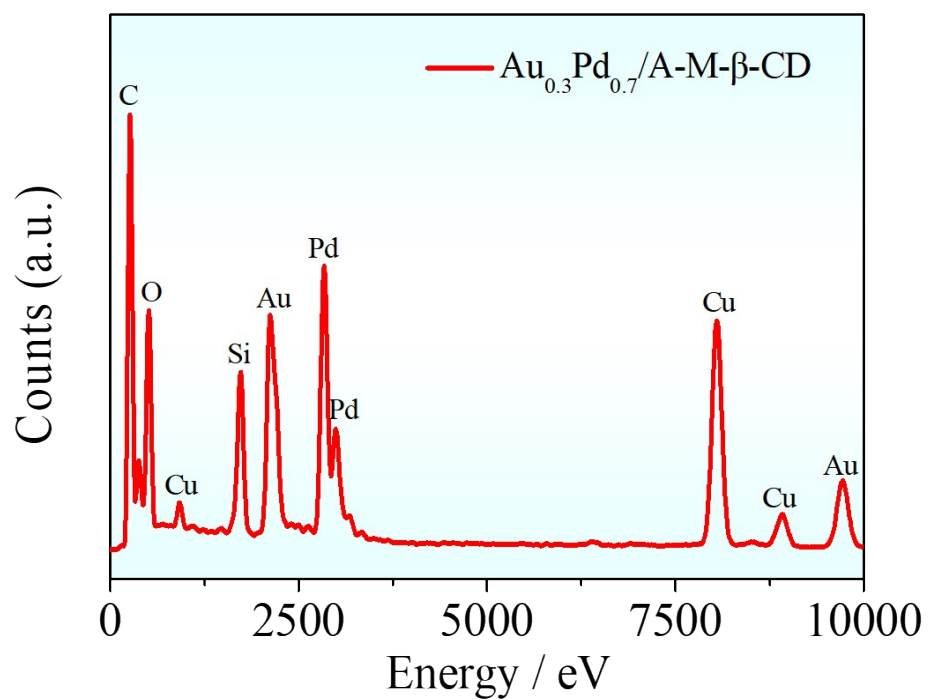

**Fig. S3** EDX spectrum of Au<sub>0.3</sub>Pd<sub>0.7</sub>/A-M-β-CD.

**Table S1.** The metal loading amounts and the molar ratios of Au/Pd of Au<sub>0.3</sub>Pd<sub>0.7</sub>/A-M-β-CD before and after cyclic tests for dehydrogenation of FA reaction.

| Sample                                                            | Au loading (mg) | Pd loading (mg) | Ratio of Au/Pd (mol/mol) |
|-------------------------------------------------------------------|-----------------|-----------------|--------------------------|
| Au <sub>0.3</sub> Pd <sub>0.7</sub> /A-M-β-CD before cyclic tests | 3.215           | 4.070           | 0.298:0.702              |
| Au <sub>0.3</sub> Pd <sub>0.7</sub> /A-M-β-CD after cyclic tests  | 3.210           | 4.052           | 0.299:0.701              |

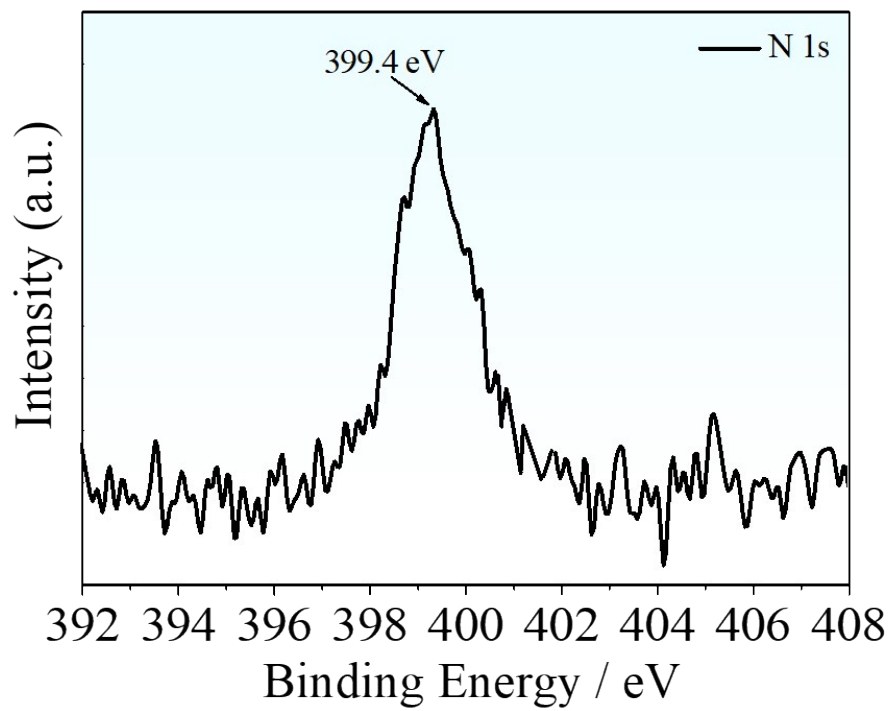

**Fig. S4** High-resolution XPS spectrum of N1s for Au<sub>0.3</sub>Pd<sub>0.7</sub>-A.

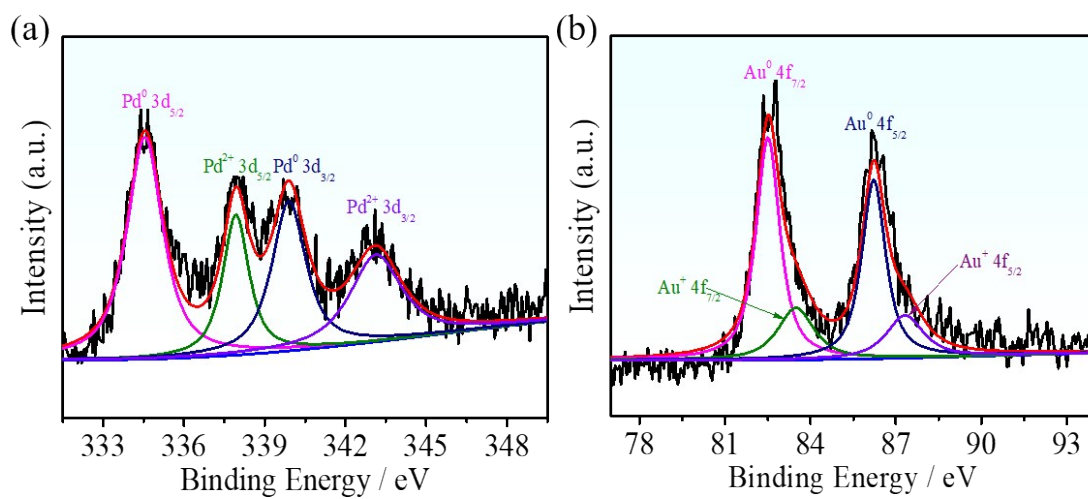

**Fig. S5** High-resolution XPS spectra of (a) Pd 3d and (b) Au 4f for Au<sub>0.3</sub>Pd<sub>0.7</sub>/A-M-β-CD.

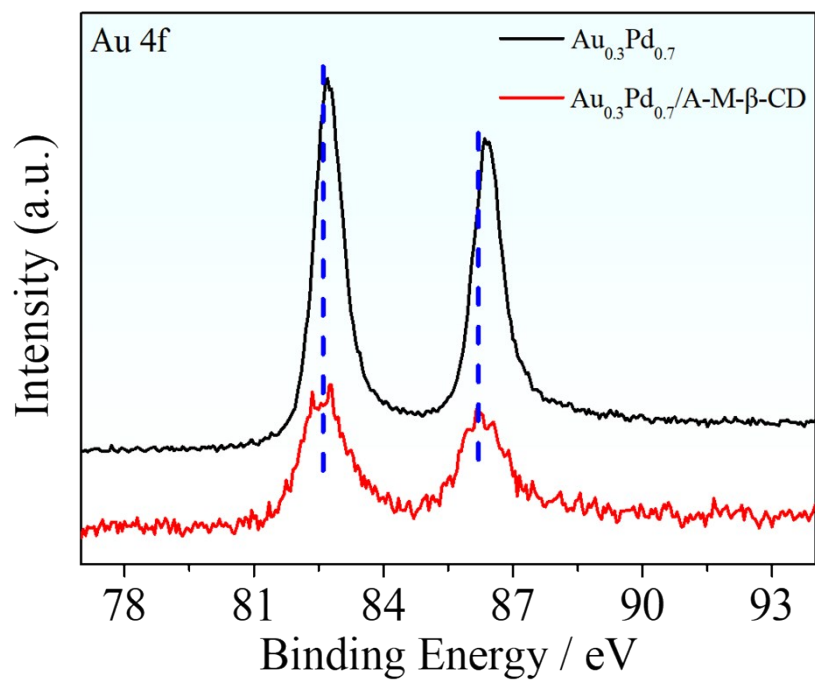

**Fig. S6** High-resolution XPS spectra of Au 4f for Au<sub>0.3</sub>Pd<sub>0.7</sub>/A-M-β-CD and Au<sub>0.3</sub>Pd<sub>0.7</sub> NPs.



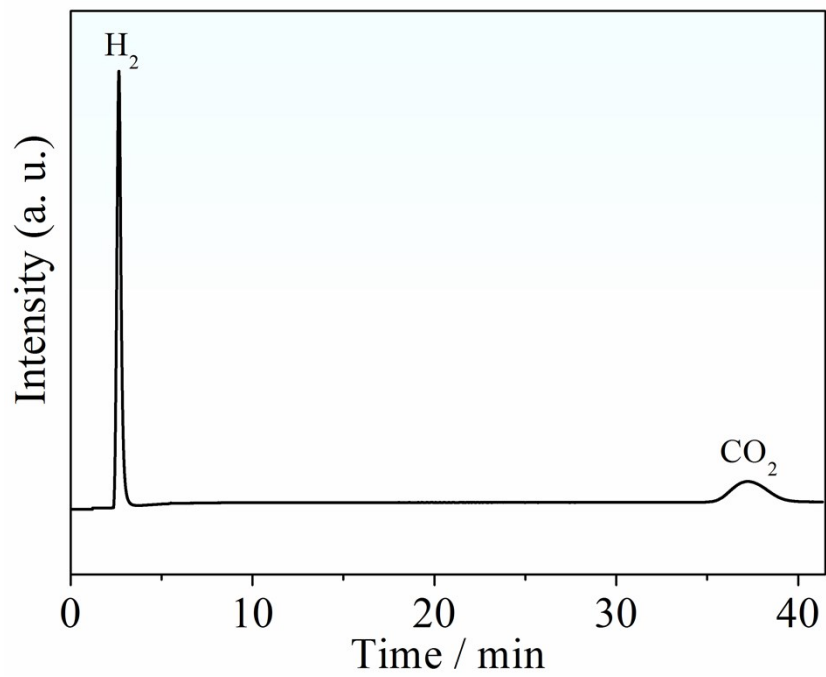

**Fig. S7** GC spectrum using TCD for the evolved gas from FA aqueous solution (1.0 M, 5.0 mL) over Au<sub>0.3</sub>Pd<sub>0.7</sub>/A-M- $\beta$ -CD at 323 K.

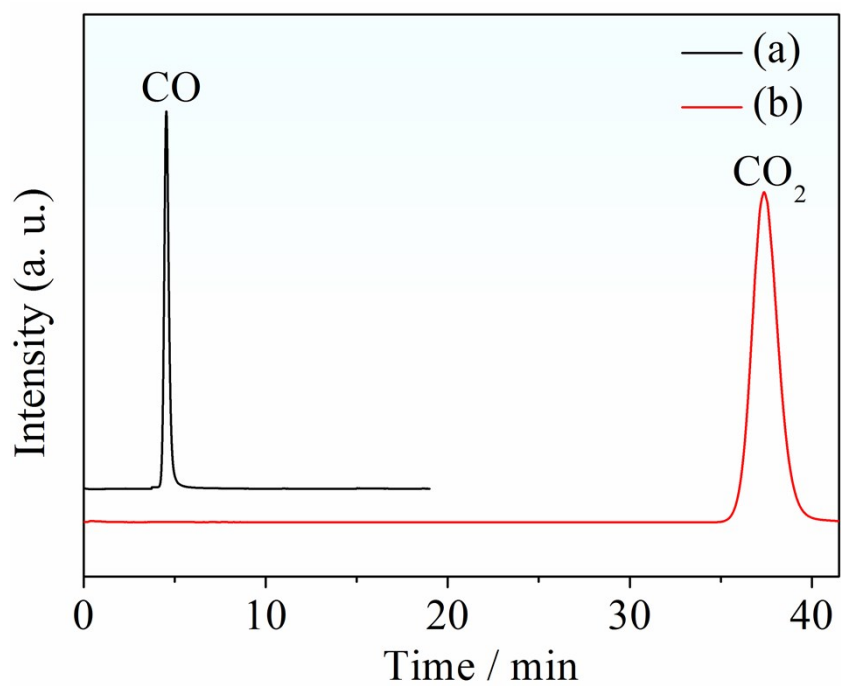

**Fig. S8** GC spectrum using FID-Methanator for the (a) commercial pure CO, and (b) evolved gas from FA aqueous solution (1.0 M, 5.0 mL) over Au<sub>0.3</sub>Pd<sub>0.7</sub>/A-M-β-CD at 323 K.

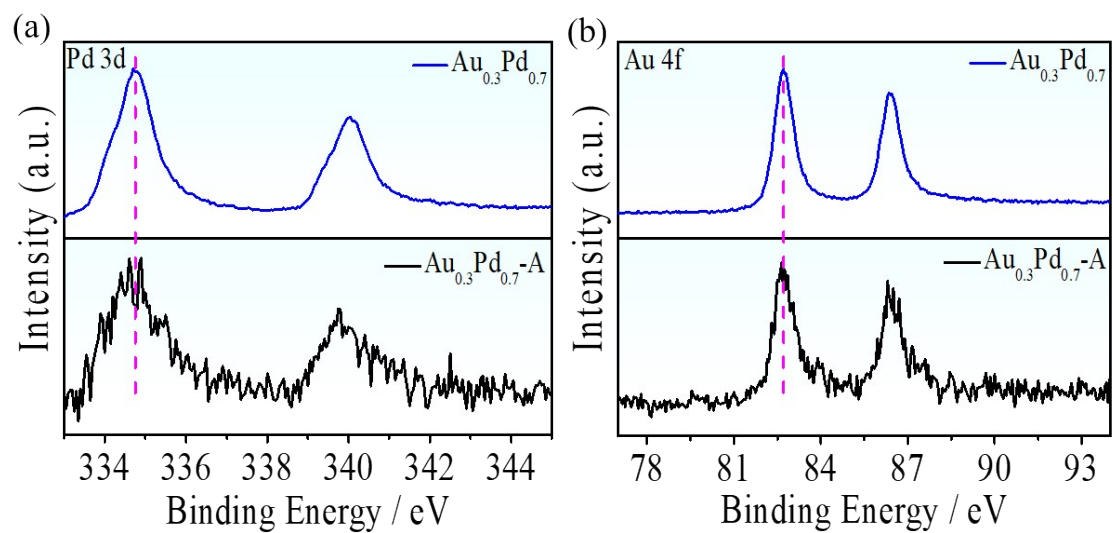

**Fig. S9** High resolution XPS spectra of (a) Pd 3d and (b) Au 4f for Au<sub>0.3</sub>Pd<sub>0.7</sub>-A and Au<sub>0.3</sub>Pd<sub>0.7</sub> NPs.

**Table S2.** Comparisons of catalytic activities for the dehydrogenation of FA catalyzed by previously reported heterogeneous catalysts with the as-synthesized in this work.

| Catalyst                                                                 | Temp. (K) | $n_{\text{catalyst}}/n_{\text{FA}}$ | Additive | TOF ( $\text{h}^{-1}$ ) | $E_a$ (kJ/mol) | Ref.      |
|--------------------------------------------------------------------------|-----------|-------------------------------------|----------|-------------------------|----------------|-----------|
| <b><i>Without additive</i></b>                                           |           |                                     |          |                         |                |           |
| Au@Pd/N-mrGO                                                             | 298       | 0.0200                              | None     | 89.1 <sup>a</sup>       | ---            | 12        |
| Au <sub>42</sub> Pd <sub>58</sub>                                        | 323       | 0.0100                              | None     | 382 <sup>a</sup>        | 22 ± 1         | 46        |
| Pd <sub>IMP</sub> /CNF                                                   | 303       | 0.0188                              | None     | 563.2 <sup>b</sup>      | 27.50          | 47        |
| Pd/CN <sub>0.25</sub>                                                    | 298       | 0.0075                              | None     | 752 <sup>b</sup>        | 48.80          | 48        |
| Ni <sub>0.4</sub> Pd <sub>0.6</sub> /NH <sub>2</sub> -N-rGO              | 298       | 0.0200                              | None     | 954.3 <sup>a</sup>      | ---            | 41        |
| Pd-MnO <sub>x</sub> /SiO <sub>2</sub> -NH <sub>2</sub>                   | 323       | 0.1068                              | None     | 1300 <sup>a</sup>       | 61.9           | 49        |
| Cr <sub>0.4</sub> Pd <sub>0.6</sub> /MIL-101-NH <sub>2</sub>             | 323       | 0.0200                              | None     | 2009 <sup>a</sup>       | 43.50          | 27        |
| Pd/A-SEP-NH <sub>2(0.9)</sub>                                            | 333       | 0.0315                              | None     | 5587 <sup>b</sup>       | 44.5           | 50        |
| Au <sub>0.3</sub> Pd <sub>0.7</sub> /A-M-β-CD                            | 323       | 0.0200                              | None     | 7352 <sup>b</sup>       | 39.50          | This work |
| <b><i>With Additive</i></b>                                              |           |                                     |          |                         |                |           |
| Pd-CNTs-in                                                               | 303       | 0.0214                              | HCOONa   | 1135.8 <sup>a</sup>     | 36.60          | 51        |
| Pd-B/C                                                                   | 303       | 0.0143                              | HCOONa   | 1184 <sup>b</sup>       | ---            | 7         |
| Co <sub>5</sub> Pd <sub>5</sub> /CTF-600                                 | 323       | 0.0070                              | HCOOK    | 2129 <sup>a</sup>       | 35.94          | 52        |
| (Co <sub>6</sub> )Ag <sub>0.1</sub> Pd <sub>0.4</sub> /RGO               | 323       | 0.0200                              | HCOONa   | 2739 <sup>b</sup>       | 43.10          | 53        |
| Pd/S-1-in-K                                                              | 323       | 0.0100                              | HCOONa   | 3027 <sup>b</sup>       | 39.2           | 54        |
| Pd/PDA-rGO                                                               | 323       | 0.0150                              | HCOONa   | 3810 <sup>b</sup>       | 54.30          | 55        |
| (Co <sub>3</sub> ) <sub>E</sub> Au <sub>0.6</sub> Pd <sub>0.4</sub> /rGO | 323       | 0.0200                              | HCOONa   | 4840 <sup>a</sup>       | ---            | 16        |
| Au <sub>2</sub> Pd <sub>3</sub> @(P)N-C                                  | 303       | 0.0170                              | HCOONa   | 5400 <sup>a</sup>       | ---            | 56        |

a. Initial TOF values calculated based on total metal.

b. Initial TOF values calculated based on total Pd atoms.

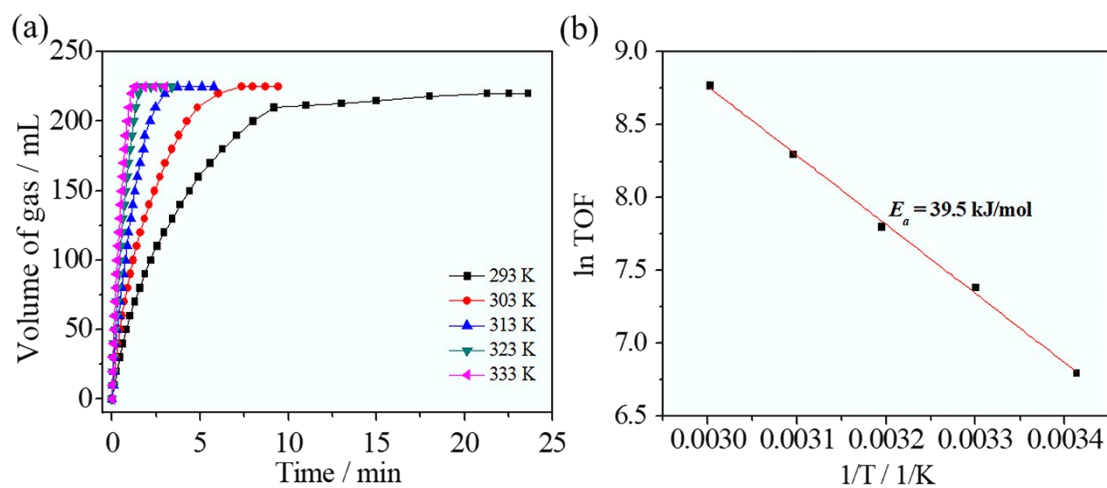

**Fig. S10** (a) Plot of volume of gas over time for the dehydrogenation of FA catalyzed by Au<sub>0.3</sub>Pd<sub>0.7</sub>/A-M-β-CD at different temperatures; (b) Arrhenius plot of ln TOF vs. 1/T for Au<sub>0.3</sub>Pd<sub>0.7</sub>/A-M-β-CD.

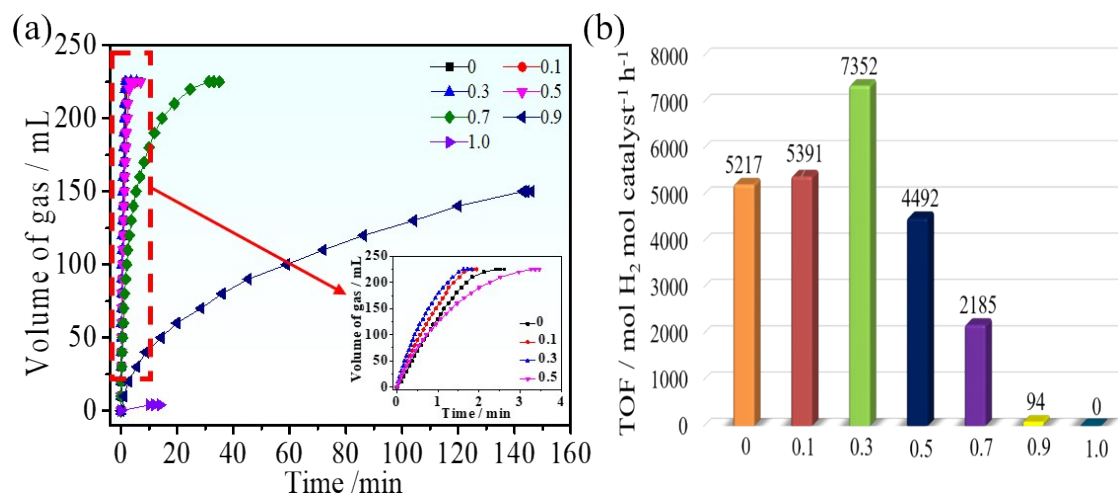

**Fig. S11** (a) Time-course plots for the dehydrogenation of FA (1.0 M, 5.0 mL) catalyzed by Au<sub>x</sub>Pd<sub>1-x</sub>/A-M-β-CD (x = 0, 0.1, 0.3, 0.5, 0.7, 0.9 and 1.0) at 323 K and the inset shows the corresponding larger plots; (b) their related initial TOF values.

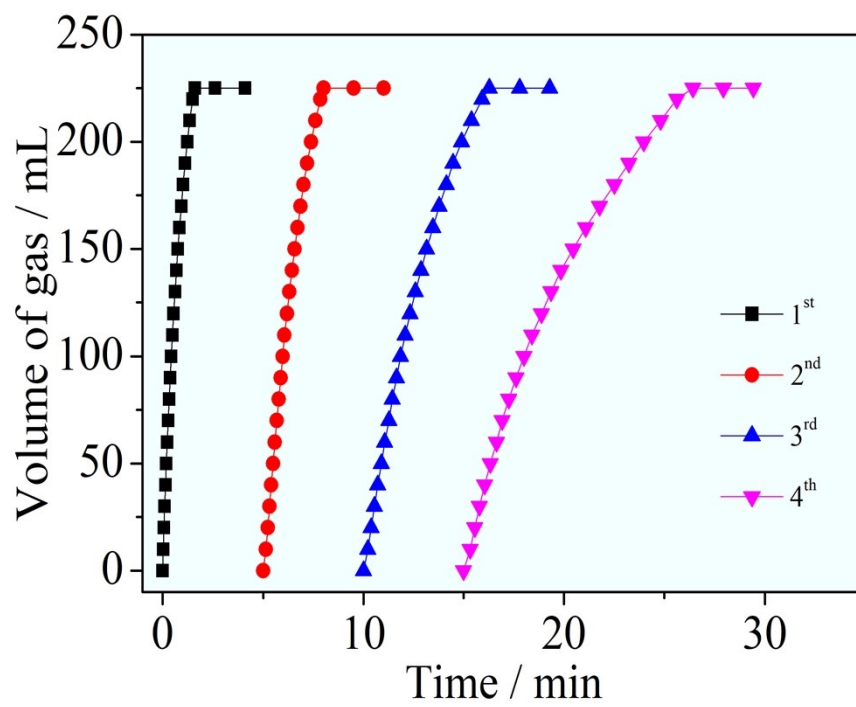

**Fig. S12** Durability test of Au<sub>0.3</sub>Pd<sub>0.7</sub>/A-M-β-CD towards the dehydrogenation of FA.

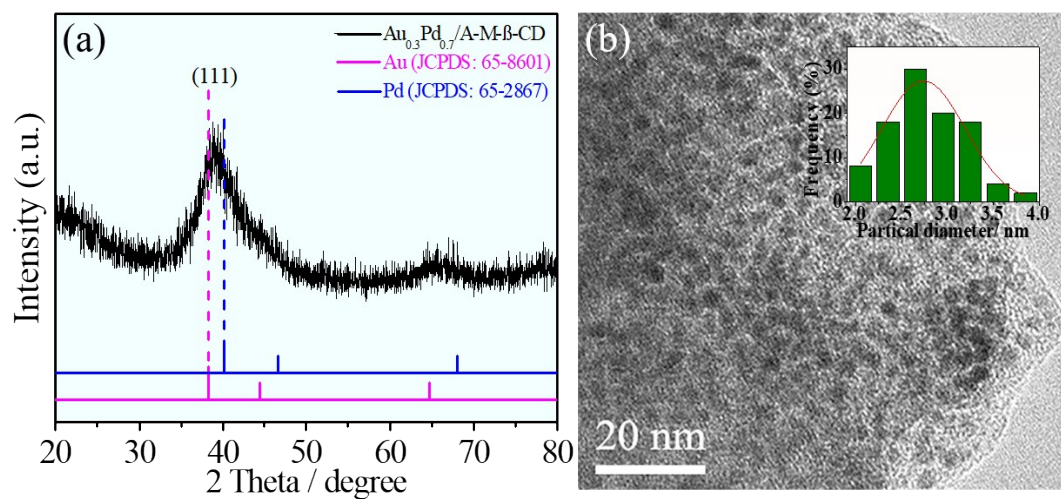

**Fig. S13** (a) XRD spectrum; (b) TEM image and the corresponding particle size distribution (inset) of Au<sub>0.3</sub>Pd<sub>0.7</sub>/A-M-β-CD after the 4<sup>th</sup> run.
